# Supplementary material
Source: ML conference proceedings conference paper supplement (https://proceedings.neurips.cc/paper_files/paper/2023/hash/a48e5877c7bf86a513950ab23b360498-Abstract.html)
Supplement: Supplementary file 1 [file a48e5877c7bf86a513950ab23b360498-Supplemental-Conference.pdf]

## A Conditional Majority

Given formulas  $\phi, \psi$ ,  $Mi : \phi. \psi$  is a sentence that is true iff  $\psi$  is true for at least half the values of  $i$  that make  $\phi$  true.

**Proposition 2.** For any two predicates  $\phi(i)$  and  $\psi(i)$ ,  $Mi : \phi(i). \psi(i)$  can be expressed in FO(M).

*Proof.*  $Mi : \phi. \psi$  can be rewritten using a counting quantifier and a threshold quantifier:

$$\exists k, k'. \left[ 2k' = k \wedge \exists^k i : \phi(i) \wedge \exists^{\geq k'} j : (\phi(j) \wedge \psi(j)) \right].$$

The formula  $2k' = k$  can be defined using bit. We then use the fact that counting and threshold quantifiers can be expressed in terms of majority quantifiers (Barrington et al., 1990) to conclude that  $Mi : \phi. \psi$  can be expressed in FO(M).  $\square$

## B Omitted Proofs

Table 1 summarizes the notation we use in the following proofs when describing computation graphs and circuit families.

Table 1: Summary of common notation for computation graph and circuit families.

| Graph                                  | Circuit                              | Output Range                        | Description                          |
|----------------------------------------|--------------------------------------|-------------------------------------|--------------------------------------|
| $i'$                                   | $i$                                  | $\mathbb{Z}$                        | index of node or gate                |
| $\text{node}_{\mathcal{G}}(n, i')$     | $\text{node}_{\mathcal{C}}(n, i)$    | $\mathfrak{F}^{18}$                 | type of node or gate                 |
| $\text{edge}_{\mathcal{G}}(n, i', j')$ | $\text{edge}_{\mathcal{C}}(n, i, j)$ | $\mathbb{Z}$                        | argument # of edge $i \rightarrow j$ |
| $\text{size}_{\mathcal{G}}(n)$         | $\text{size}_{\mathcal{C}}(n)$       | $\mathbb{Z}$                        | # of nodes or gates                  |
| $\text{depth}_{\mathcal{G}}(n)$        | $\text{depth}_{\mathcal{C}}(n)$      | $\mathbb{Z}$                        | longest path length                  |
|                                        | $\text{bnode}(n, i)$                 | $[0, \text{size}_{\mathcal{G}}(n)]$ | block containing $i$                 |
|                                        | $\text{bstart}(n, i')$               | $[0, \text{size}_{\mathcal{C}}(n)]$ | first gate in block $i'$             |
|                                        | $\text{bsize}(n, i')$                | $\mathbb{Z}$                        | size of block $i'$                   |

### B.1 Transformers are Log-Uniform Computation Graph Families

We now justify that the computation graph family defining a transformer is log-uniform. To do this, we introduce a stronger notion of uniformity called *column uniformity* that captures the highly regular structure of the transformer.

Let  $\text{node}(G, i)$  be the  $i$ -th node of computation graph  $G$ . Let  $a \bmod b$  be the remainder when  $a$  is divided by  $b$ .

**Definition 6** (Column uniformity). A computation graph family  $\mathcal{G}$  is  $T(n)$ -column-uniform iff there exists a computation graph  $K$  (with fixed size w.r.t  $n$ ) such that, for all  $i, j$  such that  $0 \leq i, j < \text{size}_{\mathcal{G}}(n)$ :

1.  $\text{node}_{\mathcal{G}}(n, i) = \text{node}(K, i \bmod \text{size}(K))$ .
2. If  $\lfloor i/\text{size}(K) \rfloor = \lfloor j/\text{size}(K) \rfloor$ , then

$$\text{edge}_{\mathcal{G}}(n, i, j) = \text{edge}(K, i \bmod \text{size}(K), j \bmod \text{size}(K)).$$

Otherwise,  $\text{edge}_{\mathcal{G}}(n, i, j)$  can be computed by a deterministic Turing machine in time  $T(n)$ .

We define *log-column-uniform* analogously to log-uniform: i.e., we let  $T(n) = O(\log n)$ . log-column-uniform implies log-uniform because our implementations of  $\text{node}_{\mathcal{G}}$  and  $\text{edge}_{\mathcal{G}}$  can store  $K$  in a finite lookup table and compute the quotient and remainder of  $i$  and  $j$  by  $\text{size}(K)$  in  $O(\log n)$  time using Lemma 12. The edges outside of  $K$  are computable in  $O(\log n)$  time by construction.

**Lemma 1** (Proof in Appendix B.1). A transformer  $\mathcal{T}$  is a log-uniform computation graph family where  $\mathfrak{F}$  contains embedding, self-attention, feedforward, and output components.

*Proof.* We show the stronger condition that any transformer  $\mathcal{T}$  is a log-column-uniform computation graph family, which implies it is log-uniform.

We have the column  $K$  by Definition 2: all that remains to show is that  $\text{edge}_{\mathcal{G}_{\mathcal{T}}}$  can be computed in time  $O(\log n)$  for edges outside the column. These edges route from the layer  $\ell$  output to the self-attention heads of layer  $\ell + 1$ . Following from the column structure, there exists  $k_\ell$  such that a node  $i$  is an output vector of layer  $\ell$  iff  $k_\ell = i \bmod \text{size}(K)$ . In a finite lookup table, we can store  $k_\ell$  for each  $\ell + 1$ , and use this for self-attention routing. For an unmasked self-attention head  $j$ , we compute:

$$\text{edge}_{\mathcal{G}_{\mathcal{T}}}(n, i, j) = \begin{cases} \lfloor i/\text{size}(K) \rfloor & \text{if } k_\ell = i \bmod \text{size}(K) \\ -1 & \text{otherwise.} \end{cases}$$

For causally masked attention, we extend the first case to check that  $\lfloor i/\text{size}(K) \rfloor \leq \lfloor j/\text{size}(K) \rfloor$ . Either way, this logic can be implemented in time  $O(\log n)$  via Lemma 12. Thus, we conclude that  $\mathcal{G}_{\mathcal{T}}$  is column-uniform.  $\square$

## B.2 Transformer Components are Computable by Log-Uniform Threshold Circuits

**Lemma 2** (Proof in Appendix B.2). *Let  $\mathcal{T}$  be a log-precision transformer with fixed parameters  $\theta_{\mathcal{T}}$ . Then each component in  $\mathfrak{F}$  is computable in log-uniform  $\text{TC}^0$ .*

We prove a more general version of Lemma 2 that handles some cases with weights growing with  $n$ . The weights  $\theta_{\mathcal{T}}$  are just a special case of a computation graph (that do not depend on the input); we can thus apply our definition of log-uniform to them. Lemma 2 follows from a more general result with log-uniform  $\theta_{\mathcal{T}}$ :

**Lemma 5.** *Let  $\mathcal{T}$  be a log-uniform transformer with log-uniform  $\theta_{\mathcal{T}}$ . Then each component in  $\mathfrak{F}$  is computable in log-uniform  $\text{TC}^0$ .*

*Proof.* In Appendix C, we show that log-uniform  $\theta_{\mathcal{T}}$  implies:

1. The embedding component is computable in log-uniform  $\text{TC}^0$  (Lemma 6).
2. The self attention mechanism is computable in log-uniform  $\text{TC}^0$  (Lemma 7).
3. The activation block is computable in log-uniform  $\text{TC}^0$  (Lemma 8).
4. The output classifier head is computable in log-uniform  $\text{TC}^0$  (Lemma 9).

We have shown that each  $\mathcal{F} \in \mathfrak{F}$  is computable in log-uniform  $\text{TC}^0$ .  $\square$

## B.3 Transformer Component Size Has a Log-Time Upper Bound

**Lemma 3** (Proof in Appendix B.3). *Let  $\mathcal{T}$  be a log-precision transformer with fixed parameters  $\theta_{\mathcal{T}}$ . There exists a function  $\text{bsize}(n)$  that is a power of 2 and computable in  $O(\log n)$  time s.t.  $\text{size}_{\mathcal{F}}(n) \leq \text{bsize}(n)$  for all  $\mathcal{F} \in \mathfrak{F}$ .*

*Proof.* Let  $2^{b(n)}$  be the least power of 2 at least as large as  $\text{size}_{\mathcal{F}}(n)$  for all  $\mathcal{F}$ . We observe that  $2^{b(n)}$  is at most  $2 \cdot \max_{\mathcal{F}} \text{size}_{\mathcal{F}}(n)$  for all  $n$ . Because each  $\mathcal{F}$  has poly size, there is a fixed  $k$  such that, for large enough  $n$ ,<sup>19</sup>

$$\begin{aligned} 2^{b(n)} &\leq n^k \\ \Rightarrow b(n) &\leq k \lceil \log n \rceil. \end{aligned}$$

Define  $b'(n) = k \lceil \log n \rceil$  and  $\text{bsize}(n) = 2^{b'(n)}$ .  $\text{bsize}(n)$  is both a power of 2 and an upper bound on  $2^{b(n)}$ ; what remains to be shown is that it can be computed in time  $O(\log n)$ . We can first compute  $\lceil \log n \rceil$  in time  $O(\log n)$  by finding the greatest nonzero index of  $n$ . Next, we can compute  $b'(n) = k \cdot \lceil \log n \rceil$  in time  $O(\log \log n)$  since  $k$  is fixed size and  $\lceil \log n \rceil$  has size at most  $O(\log \log n)$  (Brent & Zimmermann, 2010). Finally, we compute  $\text{bsize}(n) = 2^{b'(n)}$  by simply left-shifting 1 at most  $O(\log n)$  times.  $\square$

<sup>19</sup>We can compute  $\text{bsize}(n)$  for small  $n$  using finite lookup.

## B.4 Circuit Families Can Be Padded to Log-Time Size Upper Bounds

Recall that the last  $p$  bits of our circuits represent the circuit's output (cf. Section 5.1). In Lemma 4, we consider  $\mathcal{F}(x) = \mathcal{F}'(x)$  if and only if the last  $p$  bits of  $\mathcal{F}$  and  $\mathcal{F}'$  agree for all  $x$ .

**Lemma 4** (Proof in Appendix B.4). *If  $\mathcal{F}$  is a log-uniform  $\text{TC}^0$  family and  $\text{size}_{\mathcal{F}}(n) \leq \text{bsize}(n)$ , there exists a log-uniform  $\text{TC}^0$  family  $\mathcal{F}'$  s.t.  $\mathcal{F}(x) = \mathcal{F}'(x)$  for all  $x$  and  $\text{size}_{\mathcal{F}'}(n) = \text{bsize}(n)$ .*

*Proof.* The high level idea is that we can pad  $\mathcal{F}$  to a circuit  $\mathcal{F}'$  that has size  $\text{bsize}(n)$  and simply copies over the  $p$  output bits of  $\mathcal{F}$  to its own last  $p$  bits using identity gates.

We first set  $\text{node}_{\mathcal{F}'}$  to copy over the existing circuit and append identity nodes. Let  $\text{Id}$  denote an identity node. Then  $\text{node}_{\mathcal{F}'}$  is defined as:

$$\text{node}_{\mathcal{F}'}(n, i) = \begin{cases} \text{node}_{\mathcal{F}}(n, i) & \text{if } \text{node}_{\mathcal{F}}(n, i) \neq \emptyset \\ \text{Id} & \text{if } \text{node}_{\mathcal{F}}(n, i) = \emptyset \wedge i < \text{bsize}(n) \\ \emptyset & \text{otherwise.} \end{cases}$$

We see that the size of  $\mathcal{F}'$  will thus be of size  $\text{bsize}(n)$ .

Next, we extend  $\text{edge}_{\mathcal{F}'}(n, i, j)$  to route the original output bits to the new output bits. Recall that an edge value of 0 means  $i$  is the first argument of gate  $j$ , and an edge value of  $-1$  means there is no edge  $i \rightarrow j$ . Let  $k_j = p(n) - (\text{bsize}(n) - j)$  be the index of node  $j$  as an output gate in  $\mathcal{F}'$ . For example,  $k = 0$  for the first output bit. Now let  $\text{output}_{\mathcal{F}}(n, i, k)$  represent whether node  $i$  is the  $k$ -th output of  $F_n$ . We can compute  $\text{output}_{\mathcal{F}}(n, i, k)$  in terms of  $\text{node}_{\mathcal{F}}$  as follows:

$$\text{output}_{\mathcal{F}}(n, i, k) \iff \text{node}_{\mathcal{F}}(n, i + p(n) - k - 1) \neq \emptyset \wedge \text{node}_{\mathcal{F}}(n, i + p(n) - k) = \emptyset.$$

Then  $\text{edge}_{\mathcal{F}'}$  is defined:

$$\text{edge}_{\mathcal{F}'}(n, i, j) = \begin{cases} \text{edge}_{\mathcal{F}}(n, i, j) & \text{if } \text{edge}_{\mathcal{F}}(n, i, j) \neq -1 \\ 0 & \text{if } \text{output}_{\mathcal{F}}(n, i, k_j) \\ -1 & \text{otherwise.} \end{cases}$$

The first condition simply copies over the original edges. The second condition adds  $p(n)$  new edges (for the different values of  $k$ ) that route the final  $p(n)$  nodes of  $\mathcal{F}$  to the final  $p(n)$  nodes of  $\mathcal{F}'$ , guaranteeing that the two circuits will compute the same function.

Because both  $\text{node}_{\mathcal{F}'}$  and  $\text{edge}_{\mathcal{F}'}$  just rely on addition, conditional branching, and a finite number of calls to functions computable in time  $O(\log n)$ , they are both computable in time  $O(\log n)$ .  $\square$

## C Transformer Column Components

In this section, we generally omit layer subscripts for clarity. We assume a pre-norm (Xiong et al., 2020) parameterization of the transformer for concreteness and because this is more standard in newer transformers. However, the results would also hold with the original post-norm (Vaswani et al., 2017).

As mentioned in the main text, we view  $\theta_{\mathcal{T}}$  as a concatenation of the parameters for the transformer functions. Thus, if  $m$  and  $w$  are computable in time  $O(\log n)$  and  $\theta_{\mathcal{T}}$  is log-uniform, it follows that the parameter vector for each  $\phi, s, v, f$ , and  $\kappa$  is itself log-uniform because we can map indices in the smaller parameter vectors to indices in  $\theta_{\mathcal{T}}$  in time  $O(\log n)$ .

### C.1 Transformer Embeddings

For each position  $1 \leq i \leq n$ , the transformer embedding function represents token  $\sigma_i \in \Sigma$  and its position  $i$  with a vector. Let  $\mathbf{V}$  be an embedding matrix of size  $|\Sigma| \times m$  where each row represents the embedding for some  $\sigma$ . Let  $f : \mathbb{N} \rightarrow \mathbb{D}_p^m$  be computable in time  $O(\log n)$ . Then,

$$\phi(\sigma_i, i) = \mathbf{v}_{\sigma_i} + f(i).$$

**Lemma 6.** *If  $\theta_{\mathcal{T}}$  is log-uniform, then  $\phi$  is computable in log-uniform  $\text{TC}^0$ .*

*Proof.* The embedding block can be expressed as a constant-size computation graph that constructs  $\mathbf{V}$ , computes  $\mathbf{v}_{\sigma_i}$  using an affine transformation, computes  $f(i)$ , and then, finally, sums  $\mathbf{v}_{\sigma_i}$  and  $f(i)$ . The first step is computable by a log-uniform constant-depth, poly-size threshold circuit family since  $\theta_{\mathcal{T}}$  is log-uniform. We can compute an affine transformation via a log-uniform constant-depth poly-size threshold circuit family via Lemma 10.  $f(i)$  can be directly computed by the Turing machine constructing the circuit by construction. The sum of the two terms can then be computed by a log-uniform constant-depth threshold circuit of size polynomial in  $m$ , which is also polynomial in  $n$ . Since we have a computation graph where all node types are computable by log-uniform, constant-depth, poly-size threshold circuit families, we conclude by Corollary 3.2 that  $\phi$  can also be computed by log-uniform, constant-depth, poly-size threshold circuit family.  $\square$

## C.2 Self Attention

The two components of the self attention block are  $s$ , the similarity function, and  $v$ , the value function. Let  $\mathbf{h}_i$  be the hidden state at the previous layer and  $\bar{\mathbf{h}}_i = \text{lnorm}(\mathbf{h}_i)$ . Then, the similarity function first computes queries and keys, and then takes the scaled dot-product between them:

$$\begin{aligned}\mathbf{q}_i &= \mathbf{W}_q \bar{\mathbf{h}}_i + \mathbf{b}_q \\ \mathbf{k}_i &= \mathbf{W}_k \bar{\mathbf{h}}_i + \mathbf{b}_k \\ s(\mathbf{h}_i, \mathbf{h}_j) &= \exp\left(\frac{\mathbf{q}_i^\top \mathbf{k}_j}{\sqrt{m/h}}\right).\end{aligned}$$

Then the value function is defined  $v(\mathbf{h}_i) = \mathbf{W}_v \bar{\mathbf{h}}_i + \mathbf{b}_v$ . We first show that the value function (and also the keys and queries by symmetry) is computable in log-uniform  $\text{TC}^0$ :

**Lemma 7.** *If  $\theta_{\mathcal{T}}$  is log-uniform, then the self-attention component is computable in log-uniform  $\text{TC}^0$ .*

*Proof.*  $v$  is a composition of constructing the parameters (in log-uniform  $\text{TC}^0$  since  $\theta_{\mathcal{T}}$  is log-uniform), layer norm (in log-uniform  $\text{TC}^0$  by Lemma 11), and an affine transformation (in log-uniform  $\text{TC}^0$  by Lemma 10). Thus,  $v$  is computable in log-uniform  $\text{TC}^0$ .

Computing  $s$  is a constant-depth computation graph. First, we compute  $\mathbf{q}_i$  and  $\mathbf{k}_i$  and then multiply them, and all of these steps are in log-uniform  $\text{TC}^0$ . Next, we can compute  $m$  and  $h$  in time  $O(\log n)$  and build a log-uniform  $\text{TC}^0$  circuit that divides the product of the last step by  $\sqrt{m/h}$ . Finally, we compute  $p$ -precision  $\exp$ , which can be expressed in log-uniform  $\text{TC}^0$  as multiplication followed by left-shifting. Thus, by Corollary 3.2,  $s$  can be computed in log-uniform  $\text{TC}^0$ .

$s$  and  $v$  are log-uniform, so their size  $p$  is at most  $\text{poly}(n)$ . Computing self attention reduces to binary multiplication and division over  $\mathbb{D}_p$ , and performing iterated addition (summation) over  $n$  numbers in  $\mathbb{D}_p$ . Binary multiplication, binary division (Hesse, 2001), and iterated addition (Merrill & Sabharwal, 2023) can all be computed in log-uniform  $\text{TC}^0$ , i.e., by a log-uniform, constant-depth threshold circuit family of size at most  $\text{poly}(p) \leq \text{poly}(n)$ . Thus, self attention can also be computed in log-uniform  $\text{TC}^0$ .  $\square$

## C.3 Activation Block

The activation function  $f$  encapsulates the aggregation of the attention head outputs and the feedforward subnetwork of the transformer.  $f$  takes as input attention head outputs  $\mathbf{a}_{i,1}, \dots, \mathbf{a}_{i,h} \in \mathbb{D}_p^{m/h}$  and the previous layer value  $\mathbf{h}_i$ .

The first part of the activation block simulates the pooling part of the self-attention sublayer. The head outputs are first concatenated to form a vector  $\mathbf{a}_i$ , which is then passed through an affine transformation  $(\mathbf{W}_o, \mathbf{b}_o) : \mathbb{D}_p^m \rightarrow \mathbb{D}_p^m$  followed by residual connections to form the sublayer output  $\mathbf{o}_i \in \mathbb{D}_p^m$ :

$$\mathbf{o}_i = \mathbf{W}_o \mathbf{a}_i + \mathbf{b}_o + \mathbf{h}_i.$$

The second part of the activation block first applies layer-norm and then simulates the feedforward subnetwork to compute the next layer vector  $\mathbf{h}'_i$ . Let  $\bar{\mathbf{o}}_i = \text{lnorm}(\mathbf{o}_i)$ . Let  $\sigma$  be a nonlinearity computable in linear time on its input (in the most standard transformer, ReLU). Then, for affine

transformations  $(\mathbf{W}_1, \mathbf{b}_1) : \mathbb{D}_p^m \rightarrow \mathbb{D}_p^w$  and  $(\mathbf{W}_2, \mathbf{b}_2) : \mathbb{D}_p^w \rightarrow \mathbb{D}_p^m$ , the feedforward subnetwork can be defined:

$$\mathbf{h}'_i = \mathbf{W}_2 \sigma(\mathbf{W}_1 \bar{\mathbf{o}}_i + \mathbf{b}_1) + \mathbf{b}_2 + \mathbf{o}_i.$$

**Lemma 8.** *If  $\theta_{\mathcal{T}}$  is log-uniform, then  $f$  is computable in log-uniform  $\text{TC}^0$ .*

*Proof.* The activation block can be expressed as a constant-size computation graph where the nodes construct affine transformation parameters, apply affine transformations, compute layer-norm, and compute elementwise nonlinearities. Since each of these nodes is computable by a log-uniform, constant-depth, poly-size threshold circuit family, the activation block is as well.  $\square$

#### C.4 Output Classifier Head

We assume the output from the transformer is computed as follows. First,  $\bar{\mathbf{h}}_1 = \text{lnorm}(\mathbf{h}_1)$ . Then, we use a parameter vector  $\mathbf{w} \in \mathbb{D}_p^m$  and bias term  $b$  to compute:

$$\kappa(\mathbf{h}_1) = \text{sgn}(\mathbf{w}^\top \bar{\mathbf{h}}_1 + b).$$

**Lemma 9.** *If  $\theta_{\mathcal{T}}$  is log-uniform, then  $\kappa$  is computable in log-uniform  $\text{TC}^0$ .*

*Proof.* We can express computing  $\kappa$  as a composition of constructing the parameters  $\mathbf{w}, b$  and computing the affine transformation. Both parts of this composition are computable by a log-uniform, constant-depth, poly-size threshold circuit family, so computing  $\kappa$  is as well.  $\square$

### D Neural Net Building Blocks

In this section we analyze the uniformity of common neural net building blocks that are used within the various high-level transformer components.

#### D.1 Affine Transformations

Affine transformations are a core part of neural networks used in various parts of the transformer. An affine transformation takes as input parameters  $(\mathbf{W}, \mathbf{b}) : \mathbb{D}_p^a \rightarrow \mathbb{D}_p^b$  and a vector  $\mathbf{x} \in \mathbb{D}_p^a$  and returns  $\mathbf{W}\mathbf{x} + \mathbf{b}$ .

**Lemma 10.** *For  $p = O(\log n)$ , any  $p$ -precision affine transformation where  $\mathbf{W}, \mathbf{b}$  are log-uniform is computable by a log-uniform, constant-size threshold circuit family of size polynomial in  $a$  and  $b$ .*

*Proof.* We first use the uniformity of  $\mathbf{W}, \mathbf{b}$  to construct them in  $O(\log n)$  time. For the transformation  $\mathbf{W}\mathbf{x} + \mathbf{b}$ , first compute each  $\mathbf{w}_i \odot \mathbf{x}$  in parallel, where  $\odot$  represents elementwise multiplication. Since binary multiplication over polynomial-size numbers is in log-uniform  $\text{TC}^0$ , this can be done in parallel with log-uniform  $\text{TC}^0$  circuits. We then use  $b$  log-uniform, constant-depth, poly-size threshold circuit families, each corresponding to an output index, that compute the sum over the  $a$  entries of each  $\mathbf{w}_i \odot \mathbf{x}$ . The affine transformation corresponds to the composition of these two steps, and is thus computable by a log-uniform  $\text{TC}^0$  circuit family.  $\square$

#### D.2 Layer Norm

The layer norm is applied between sublayers in the transformer. Let  $\mu = (1/d) \sum_{i=1}^d x_i$ . The layer norm  $\mathbf{y} \in \mathbb{D}_p^m$  of a vector  $\mathbf{x} \in \mathbb{D}_p^m$  is computed, for scalars  $a, b \in \mathbb{D}_p$ ,

$$\mathbf{y} = a \left( \frac{\mathbf{x} - \mu}{\|\mathbf{x} - \mu\|} \right) + b.$$

**Lemma 11.** *If  $a, b$  are log-uniform, the layer norm over a vector of size  $m$  can be computed by a log-uniform threshold circuit family of constant depth and size polynomial in  $m$ .*

*Proof.* First compute  $m$  using summation over the constant term 1 from 1 to  $m$ . This summation can be computed by a log-uniform constant-depth threshold circuit family of size polynomial in  $m$ . Then compute the sum over  $\mathbf{x}$  using a similar circuit, and divide them to get  $\mu$ , using the fact that integer division is in log-uniform  $\text{TC}^0$  (Hesse, 2001). We can then compute  $\mathbf{x} - \mu$  in log-uniform  $\text{TC}^0$ .

At this point, we can compute  $\|\mathbf{x} - \mu\|$  in log-uniform  $\text{TC}^0$  (Hunter et al., 2010), then divide each  $\mathbf{x} - \mu$  by the norm in log-uniform  $\text{TC}^0$ , and then apply the final affine transformation in log-uniform  $\text{TC}^0$  (Lemma 10). Thus, computing layer norm is in log-uniform  $\text{TC}^0$ .  $\square$

## E Arithmetic Complexity

**Lemma 12.** *Given an  $m$ -bit integer  $a$  and  $n$ -bit integer  $b$ , we can compute the quotient  $\lfloor a/b \rfloor$  and remainder  $a \bmod b$  in time  $O(mn)$ .*

*Proof.* Let  $D(m, n)$  and  $M(m, n)$  denote, respectively, the time complexity of dividing and multiplying an  $m$ -bit integer by an  $n$ -bit integer. Brent & Zimmermann (2010) give the following fact:  $D(m + n, n) \leq O(M(m, n))$ . With the goal of analyzing  $D(m, n)$ , we apply this as follows:

$$\begin{aligned} D(m, n) &\leq D(m + n, n) \\ &\leq O(M(m, n)) \\ &\leq O(mn). \end{aligned}$$

$\square$

Applying Lemma 12 when  $a$  has size  $O(\log n)$  and  $b$  has size  $O(1)$  says that we can do division in time  $O(\log n)$ .
